# Supplementary material for: Biomass derived 2D carbonsviaa hydrothermal carbonization method as efficient bifunctional ORR/HER electrocatalysts
Source: Royal Society of Chemistry journal article supplement (doi:10.1039/c7ta08052b), 2017-01-01
Supplement: c7ta08052b1.pdf [file c7ta08052b1.pdf]

## Supporting information

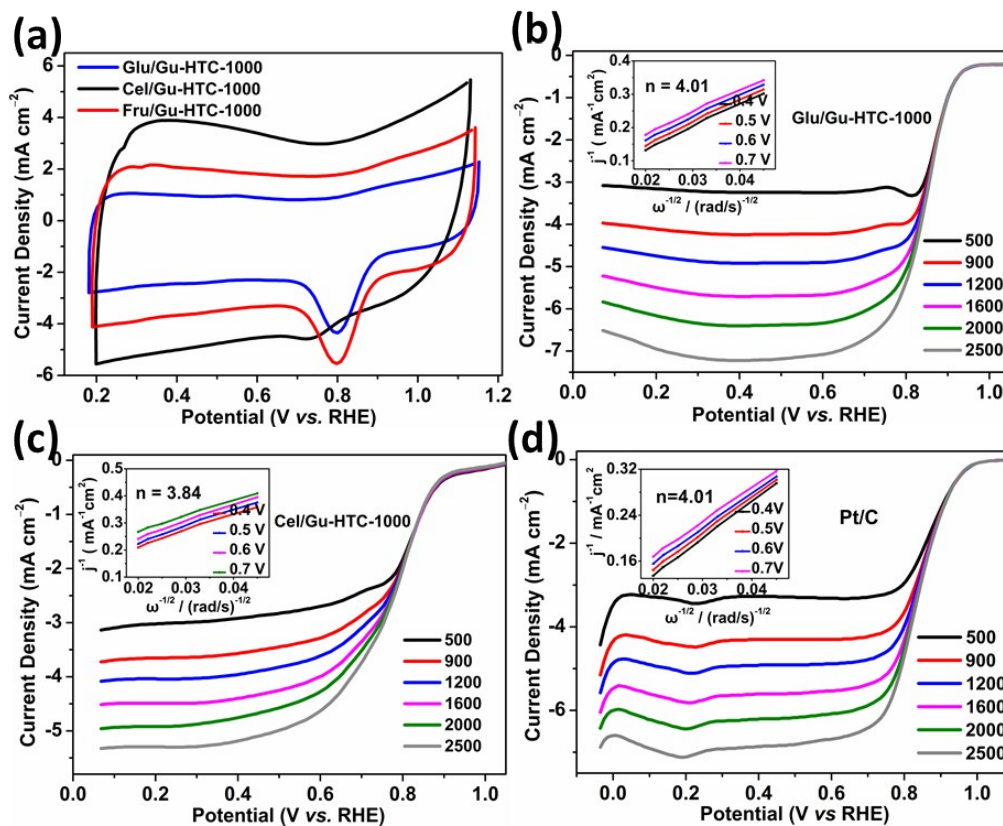

**Fig. S1** (a) CVs with  $50 \text{ mV s}^{-1}$ ; (b), (c) and (d) RDE polarisation curves at various rpms for different catalysts in  $\text{O}_2$ -saturated  $0.1\text{M KOH}$  solution.

**Table S1** Elemental analysis (wt. %)

| Samples         | C     | H     | N    | O <sup>a</sup> |
|-----------------|-------|-------|------|----------------|
| Fru/Gu-HTC-1000 | 87.26 | <0.30 | 2.43 | 10.01          |
| Glu/Gu-HTC-1000 | 81.71 | <0.30 | 2.84 | 15.15          |
| Cel/Gu-HTC-1000 | 84.64 | <0.30 | 3.26 | 11.80          |

<sup>a</sup> calculated.

**Table S2** The relative contents of different nitrogen species determined by XPS

| Samples         | Pyridinic-N (%)<br>398.4 eV | Graphitic-N (%)<br>401.1 eV | Oxidized-N (%)<br>403.1 eV | Total (%) <sup>a</sup> |
|-----------------|-----------------------------|-----------------------------|----------------------------|------------------------|
| Fru/Gu-HTC-1000 | 18.3                        | 60.8                        | 20.9                       | 79.1                   |
| Glu/Gu-HTC-1000 | 22.2                        | 46.4                        | 31.4                       | 68.6                   |
| Cel/Gu-HTC-1000 | 28.5                        | 43.2                        | 28.2                       | 71.7                   |

<sup>a</sup> The relative total content of graphitic N and pyridinic N.

| <b>Table S3</b> Comparison of carbon-based HER catalysts    |                                   |                            |                                        |                                      |                                       |
|-------------------------------------------------------------|-----------------------------------|----------------------------|----------------------------------------|--------------------------------------|---------------------------------------|
| Catalyst                                                    | $E_{\text{onset}}$<br>(V vs. RHE) | $E_{j=-10}$<br>(V vs. RHE) | Tafel slope<br>(mV dec <sup>-1</sup> ) | Electrolyte                          | Reference                             |
| g-C <sub>3</sub> N <sub>4</sub> @N-doped graphene           | 0.35                              | > 0.6                      | -                                      | 0.1 M KOH                            | Nat. Commun. 2014, 5, 3783            |
| N, P-doped porous graphene                                  | 0.35                              | > 0.6                      | -                                      | 0.1 M KOH                            | ACS Nano 2014, 8, 5290                |
| N, P-doped porous graphene                                  | 0.25                              | 0.42                       | 91                                     | 0.5 M H <sub>2</sub> SO <sub>4</sub> | ACS Nano 2014, 8, 5290                |
| N-doped holely graphene                                     | 0.30                              | 0.51                       | 157                                    | 0.1 M KOH                            | Nano Energy 2015, 15, 567             |
| N, P-doped carbon                                           | 0.29                              | 0.47                       | -                                      | 0.1 M KOH                            | Angew. Chem. Int. Ed. 2016, 128, 2270 |
| N, P, F-doped graphene                                      | 0.4                               | 0.52                       | -                                      | 0.1 M KOH                            | Angew. Chem. Int. Ed. 2016, 55, 13296 |
| Defect graphene                                             | 0.1                               | 0.32                       | 118                                    | 1 M KOH                              | Adv. Mater. 2016, 28, 9532            |
| N-doped graphene microtubes                                 | 0.30                              | 0.43                       | 117                                    | 1 M KOH                              | Nano Research 2016, 9, 2606           |
| N, P, O-doped porous graphitic carbon@oxidized carbon cloth | 0.25                              | 0.45                       | 154                                    | 1 M KOH                              | Energy Environ. Sci. 2016, 9, 1210    |
| N, S-doped carbon nanofiber                                 | 0.23                              | 0.33                       | 99                                     | 0.5 M H <sub>2</sub> SO <sub>4</sub> | Nano Energy 2017, 32, 336             |
| <b>N -doped Fru/Gu-HTC-1000</b>                             | 0.12                              | 0.35                       | 108                                    | 1 M KOH                              | <b>This work</b>                      |
